# Supplementary material
Source: ML conference proceedings conference paper supplement (https://proceedings.neurips.cc/paper_files/paper/2021/hash/5fd2c06f558321eff612bbbe455f6fbd-Abstract.html)
Supplement: Supplementary file 1 [file 5fd2c06f558321eff612bbbe455f6fbd-Supplemental.zip]

Archive with 4 entries (4 files):
- CDS_NeurIPS_camera_ready_full_paper.pdf
- __MACOSX/._CDS_NeurIPS_camera_ready_full_paper.pdf
- appendix.pdf
- __MACOSX/._appendix.pdf
